# Supplementary material for: Colonic Dysregulation of Major Metabolic Pathways in Experimental Ulcerative Colitis
Source: MDPI journal article supplement (doi:10.3390/metabo14040194), 2024-03-29
Supplement: s1 [file s1]

# Colonic Dysregulation of Major Metabolic Pathways in Experimental Ulcerative Colitis

Table S1. Oxidative stress-related pathways in DSS-induced colitis.

| Label | Pathways                                    | Total | Expected | Hits | Raw p      | -log10(p) | Holm adjust | FDR        | Impact     |
|-------|---------------------------------------------|-------|----------|------|------------|-----------|-------------|------------|------------|
| P1    | Glutathione metabolism                      | 65    | 0.17339  | 5    | 6.3114E-07 | 6.1999    | 0.00020575  | 0.00010319 | 0.064815   |
| P2    | Glycerolipid metabolism                     | 61    | 0.16272  | 2    | 0.011322   | 1.9461    | 1           | 0.2603     | 0.11438    |
| P3    | Glycolysis or Gluconeogenesis               | 66    | 0.17606  | 2    | 0.013164   | 1.8806    | 1           | 0.2603     | 0.053922   |
| P4    | Selenocompound metabolism                   | 17    | 0.045349 | 1    | 0.044434   | 1.3523    | 1           | 0.5812     | 0.021978   |
| P5    | beta-Alanine metabolism                     | 32    | 0.085363 | 1    | 0.082067   | 1.0858    | 1           | 0.70621    | 0.090909   |
| P6    | Pentose and glucuronate interconversions    | 34    | 0.090698 | 1    | 0.086977   | 1.0606    | 1           | 0.71103    | 0.019231   |
| P7    | Amino sugar and nucleotide sugar metabolism | 49    | 0.13071  | 1    | 0.123      | 0.91008   | 1           | 0.91093    | 0.036998   |
| -     | Fatty acid degradation                      | 50    | 0.13338  | 1    | 0.12536    | 0.90185   | 1           | 0.91093    | 0.00026441 |
| -     | Arginine and proline metabolism             | 50    | 0.13338  | 1    | 0.12536    | 0.90185   | 1           | 0.91093    | 0.0094467  |
| -     | Valine, leucine and isoleucine degradation  | 56    | 0.14939  | 1    | 0.13935    | 0.8559    | 1           | 0.9695     | 0.0034368  |

Pathway analysis was conducted using Fischer's exact test for enrichment analysis and betweenness centrality for topology analysis. **Total**: the total number of proteins in the pathway; **Expected**: the number of proteins in the pathway that would be expected to be altered by chance alone; **Hits**: the number of proteins in the pathway that were altered according to our data; **Raw p**: raw p-value; **-log10(p)**: the negative logarithm base 10 of the raw p-value, which is used as the y-axis on the significance vs. impact plot; **Holm adjust**: p-values adjusted using the Holm-Bonferroni method; **FDR**: false discovery rate-adjusted p-values; **Impact**: the relative impact on the pathway from enrichment and topology analysis.

**Table S2.  $\beta$ -oxidation-related pathways in DSS-induced colitis.**

| Label | Pathways                                   | Total | Expected | Hits | Raw p      | $-\log_{10}(p)$ | Holm adjust | FDR        | Impact    |
|-------|--------------------------------------------|-------|----------|------|------------|-----------------|-------------|------------|-----------|
| P1    | Fatty acid degradation                     | 50    | 0.19137  | 17   | 4.8716E-31 | 30.312          | 1.593E-28   | 1.593E-28  | 0.76776   |
| P2    | Valine, leucine and isoleucine degradation | 56    | 0.21434  | 12   | 5.1303E-19 | 18.29           | 1.6725E-16  | 8.3881E-17 | 0.073129  |
| P3    | Butanoate metabolism                       | 27    | 0.10334  | 9    | 2.3909E-16 | 15.621          | 7.7465E-14  | 1.9545E-14 | 0.2735    |
| P4    | Synthesis and degradation of ketone bodies | 11    | 0.042102 | 4    | 5.7589E-08 | 7.2397          | 1.8544E-05  | 3.1106E-06 | 0.083333  |
| P5    | Fatty acid elongation                      | 29    | 0.111    | 5    | 6.6587E-08 | 7.1766          | 2.1375E-05  | 3.1106E-06 | 1.5384    |
| P6    | beta-Alanine metabolism                    | 32    | 0.12248  | 5    | 1.12E-07   | 6.9508          | 3.584E-05   | 4.5779E-06 | 0.004329  |
| -     | Propanoate metabolism                      | 33    | 0.1263   | 5    | 1.3164E-07 | 6.8806          | 4.1993E-05  | 4.7829E-06 | 0.2808    |
| -     | Tryptophan metabolism                      | 48    | 0.18372  | 4    | 3.0734E-05 | 4.5124          | 0.0097735   | 0.001005   | 0.004065  |
| -     | Lysine degradation                         | 61    | 0.23347  | 4    | 7.9592E-05 | 4.0991          | 0.025231    | 0.0023661  | 0.0019763 |
| -     | Terpenoid backbone biosynthesis            | 23    | 0.088031 | 2    | 0.003418   | 2.4662          | 1           | 0.093141   | 0.040441  |

Pathway analysis was conducted using Fischer's exact test for enrichment analysis and betweenness centrality for topology analysis. **Total**: the total number of proteins in the pathway; **Expected**: the number of proteins in the pathway that would be expected to be altered by chance alone; **Hits**: the number of proteins in the pathway that were altered according to our data; **Raw p**: raw p-value;  **$-\log_{10}(p)$** : the negative logarithm base 10 of the raw p-value, which is used as the y-axis on the significance vs. impact plot; **Holm adjust**: p-values adjusted using the Holm-Bonferroni method; **FDR**: false discovery rate-adjusted p-values; **Impact**: the relative impact on the pathway from enrichment and topology analysis.

**Table S3. Glycolysis-related pathways in DSS-induced colitis.**

| Label | Pathways                                    | Total | Expected | Hits | Raw p      | -log10(p) | Holm adjust | FDR        | Impact    |
|-------|---------------------------------------------|-------|----------|------|------------|-----------|-------------|------------|-----------|
| P1    | Glycolysis or Gluconeogenesis               | 66    | 0.14544  | 12   | 6.8117E-22 | 21.167    | 2.2274E-19  | 2.2274E-19 | 0.14468   |
| P2    | Pentose phosphate pathway                   | 32    | 0.070517 | 6    | 4.1736E-11 | 10.379    | 1.3564E-08  | 4.5493E-09 | 0.42139   |
| P3    | Fructose and mannose metabolism             | 35    | 0.077128 | 5    | 9.1385E-09 | 8.0391    | 2.9609E-06  | 7.4707E-07 | 0.11275   |
| -     | Starch and sucrose metabolism               | 33    | 0.072721 | 4    | 6.6198E-07 | 6.1792    | 0.00021249  | 3.0924E-05 | 0.0047619 |
| -     | Pyruvate metabolism                         | 38    | 0.083739 | 4    | 1.1858E-06 | 5.926     | 0.00037947  | 4.8471E-05 | 0.008658  |
| -     | Amino sugar and nucleotide sugar metabolism | 49    | 0.10798  | 2    | 0.005087   | 2.2935    | 1           | 0.10397    | 0.036998  |
| -     | Purine metabolism                           | 136   | 0.2997   | 1    | 0.26096    | 0.58342   | 1           | 1          | 0.0016193 |

Pathway analysis was conducted using Fischer's exact test for enrichment analysis and betweenness centrality for topology analysis. **Total:** the total number of proteins in the pathway; **Expected:** the number of proteins in the pathway that would be expected to be altered by chance alone; **Hits:** the number of proteins in the pathway that were altered according to our data; **Raw p:** raw p-value; **-log10(p):** the negative logarithm base 10 of the raw p-value, which is used as the y-axis on the significance vs. impact plot; **Holm adjust:** p-values adjusted using the Holm-Bonferroni method; **FDR:** false discovery rate-adjusted p-values; **Impact:** the relative impact on the pathway from enrichment and topology analysis.

**Table S4. TCA cycle-related pathways in DSS-induced colitis.**

| Label | Pathways                                    | Total | Expected | Hits | Raw p      | -log10(p) | Holm adjust | FDR        | Impact    |
|-------|---------------------------------------------|-------|----------|------|------------|-----------|-------------|------------|-----------|
| P1    | TCA cycle                                   | 32    | 0.14846  | 21   | 1.9496E-44 | 43.71     | 6.3753E-42  | 6.3753E-42 | 0.11825   |
| P2    | Pyruvate metabolism                         | 38    | 0.17629  | 7    | 3.0241E-10 | 9.5194    | 9.8586E-08  | 4.9444E-08 | 0.017316  |
| P3    | Glycolysis or Gluconeogenesis               | 66    | 0.30619  | 5    | 1.2057E-05 | 4.9188    | 0.0038462   | 0.00043807 | 0.053922  |
| P4    | Cysteine and methionine metabolism          | 52    | 0.24124  | 4    | 9.158E-05  | 4.0382    | 0.028848    | 0.0023036  | 0.018018  |
| -     | Glyoxylate and dicarboxylate metabolism     | 31    | 0.14382  | 5    | 2.5811E-07 | 6.5882    | 8.2855E-05  | 1.2058E-05 | 0.0059289 |
| -     | Arginine and proline metabolism             | 50    | 0.23196  | 4    | 7.8428E-05 | 4.1055    | 0.024862    | 0.0023036  | 0.0080972 |
| -     | Alanine, aspartate and glutamate metabolism | 38    | 0.17629  | 3    | 0.00069736 | 3.1565    | 0.21758     | 0.014252   | 0.0070565 |
| -     | Phenylalanine metabolism                    | 23    | 0.1067   | 2    | 0.0049924  | 2.3017    | 1           | 0.085923   | 0.0090909 |
| -     | Tyrosine metabolism                         | 40    | 0.18557  | 2    | 0.014647   | 1.8343    | 1           | 0.21148    | 0.0010101 |
| -     | Calcium signaling pathway                   | 192   | 0.89074  | 3    | 0.058872   | 1.2301    | 1           | 0.61401    | 0.0026596 |

Pathway analysis was conducted using Fischer's exact test for enrichment analysis and betweenness centrality for topology analysis. **Total:** the total number of proteins in the pathway; **Expected:** the number of proteins in the pathway that would be expected to be altered by chance alone; **Hits:** the number of proteins in the pathway that were altered according to our data; **Raw p:** raw p-value; **-log10(p):** the negative logarithm base 10 of the raw p-value, which is used as the y-axis on the significance vs. impact plot; **Holm adjust:** p-values adjusted using the Holm-Bonferroni method; **FDR:** false discovery rate-adjusted p-values; **Impact:** the relative impact on the pathway from enrichment and topology analysis.
